# Supplementary material for: Functional connectivity of spoken language processing in early-stage Parkinson’s disease: An MEG study
Source: PubMed Central journal article supplement — Neuroimage Clin. 2021 Jun 6;32:102718. doi: 10.1016/j.nicl.2021.102718 (PMC8403765; doi:10.1016/j.nicl.2021.102718), 2021-06-06
Supplement: mmc1.pdf [file mmc1.pdf]

Supplementary materials:

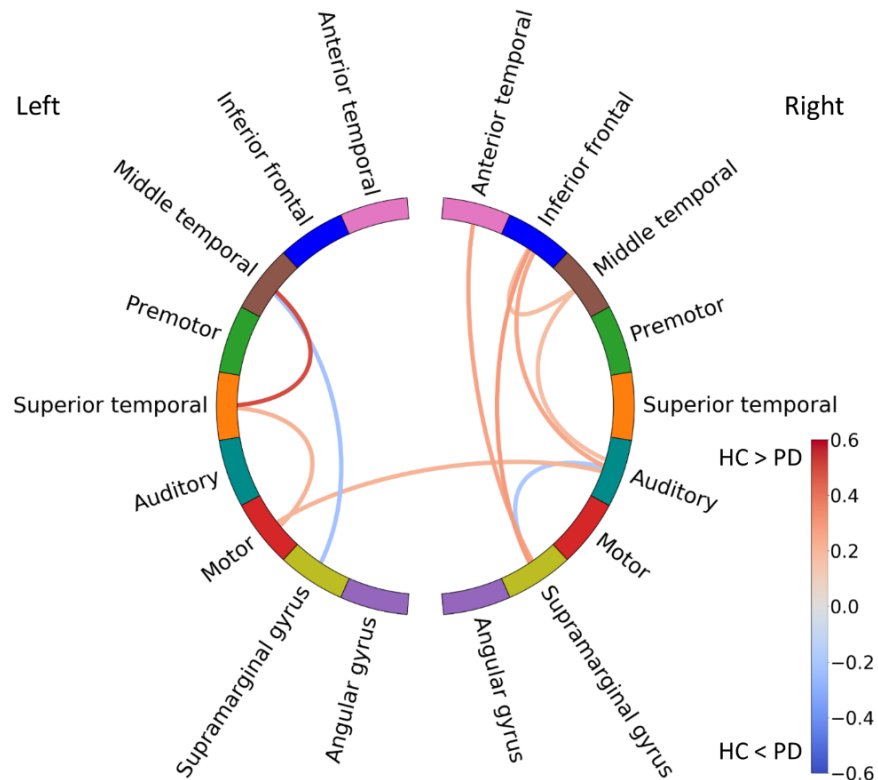

**Figure S1:** Differences in correlation scores between PD patients and controls for the action verb condition. Red connections indicate lower correlation values for PD patients relative to controls (PD < HC) and blue connections indicate higher correlation values for PD patients relative to controls (PD > HC).

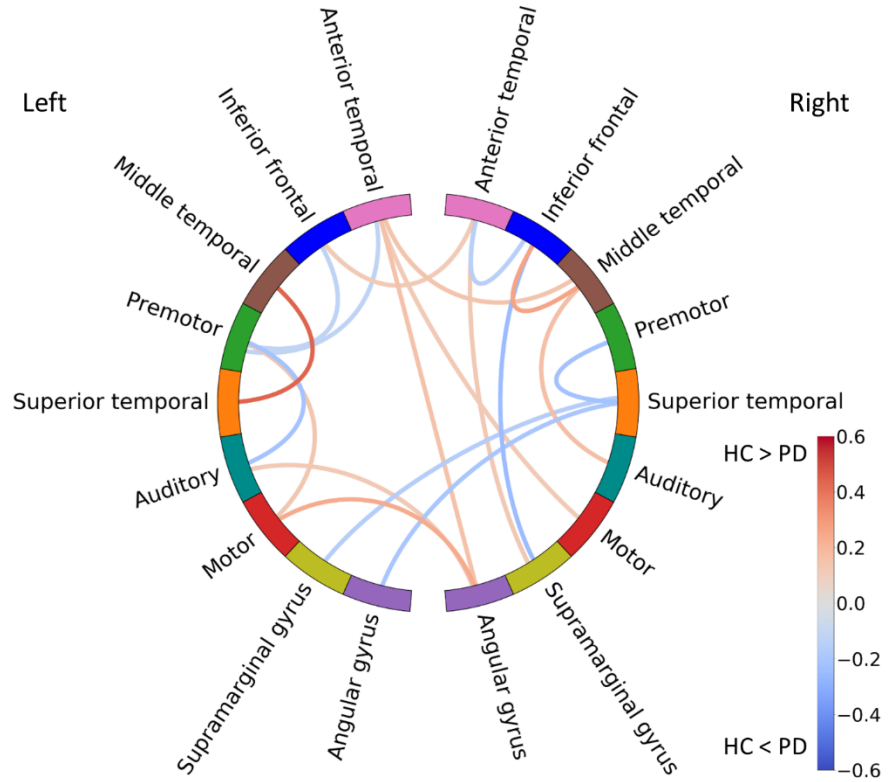

**Figure S2:** Differences in correlation scores between PD patients and controls for the abstract verb condition. Red connections indicate lower correlation values for PD patients relative to controls (PD < HC) and blue connections indicate higher correlation values for PD patients relative to controls (PD > HC).

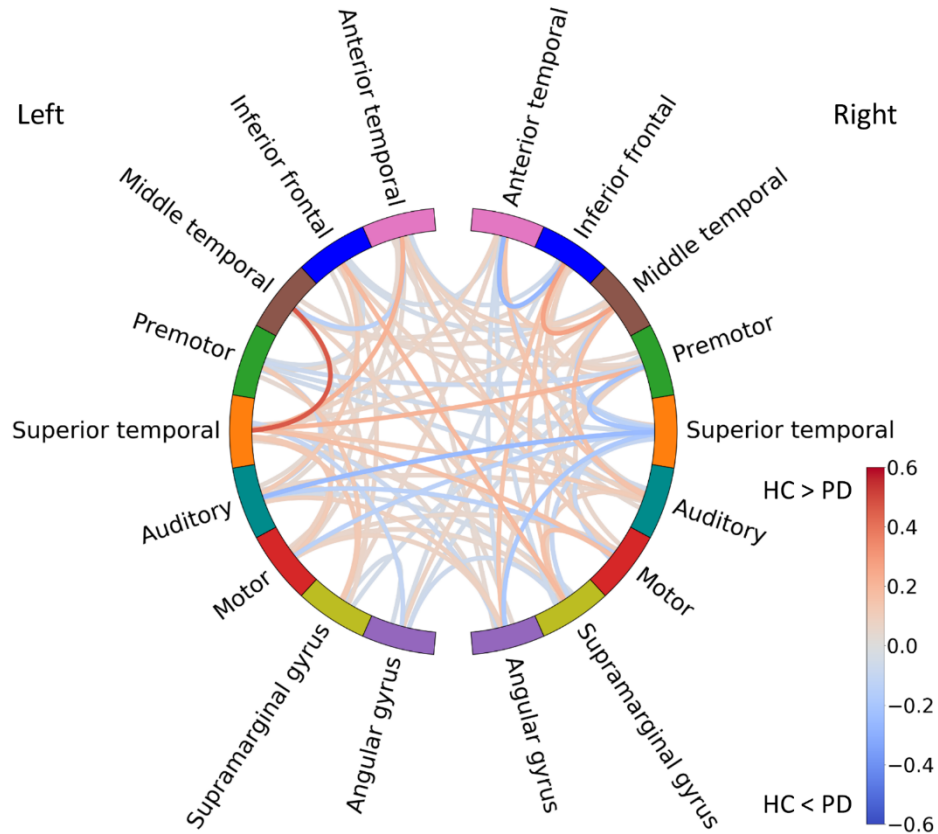

**Figure S3:** Differences in correlation scores between PD patients and controls for the incorrect morphosyntactic form condition. Red connections indicate lower correlation values for PD patients relative to controls (PD < HC) and blue connections indicate higher correlation values for PD patients relative to controls (PD > HC).

**Table S1:** Classification coefficients and the mean of correlation scores of PD patients and controls for all the selected features.

| Labels                                                                      | Classifier's coefficients | Controls' correlation Mean (SD) | PD patients' correlation Mean (SD) |
|-----------------------------------------------------------------------------|---------------------------|---------------------------------|------------------------------------|
| <b>Action verbs</b>                                                         |                           |                                 |                                    |
| Left middle temporal cortex (BA 21) - Left superior temporal cortex (BA 22) | 0.866                     | 0.403 (0.468)                   | -0.088 (0.590)                     |
| Left middle temporal cortex (BA 21) - Left supramarginal gyrus (BA 40)      | -0.826                    | 0.042 (0.270)                   | 0.259 (0.279)                      |

|                                                                                     |        |                |                |
|-------------------------------------------------------------------------------------|--------|----------------|----------------|
| Right middle temporal cortex (BA 21) - Right auditory cortex (BA 41-42)             | 0.681  | 0.313 (0.207)  | 0.139 (0.270)  |
| Right middle temporal cortex (BA 21) - Right inferior frontal gyrus (BA 44-45-47)   | 0.048  | 0.352 (0.260)  | 0.175 (0.269)  |
| Left superior temporal cortex (BA 22) - Left motor cortex (BA 4)                    | 0.228  | 0.357 (0.276)  | 0.145 (0.321)  |
| Right anterior temporal cortex (BA 38) - Right supramarginal gyrus (BA 40)          | 0.289  | 0.221 (0.345)  | -0.042 (0.364) |
| Left motor cortex (BA 4) - Right auditory cortex (BA 41-42)                         | 0.252  | 0.237 (0.223)  | 0.023 (0.271)  |
| Right supramarginal gyrus (BA 40) - Right auditory cortex (BA 41-42)                | -1.242 | -0.015 (0.226) | 0.171 (0.198)  |
| Right supramarginal gyrus (BA 40) - Right inferior frontal gyrus (BA 44-45-47)      | -0.043 | 0.609 (0.187)  | 0.316 (0.433)  |
| Right auditory cortex (BA 41-42) - Right inferior frontal gyrus (BA 44-45-47)       | 0.785  | 0.258 (0.223)  | 0.002 (0.277)  |
| <b>Abstract verbs</b>                                                               |        |                |                |
| Left middle temporal cortex (BA 21) - Left superior temporal cortex (BA 22)         | 0.431  | 0.335 (0.498)  | -0.103 (0.588) |
| Right middle temporal cortex (BA 21) - Left anterior temporal cortex (BA 38)        | 0.700  | 0.175 (0.221)  | 0.026 (0.228)  |
| Right middle temporal cortex (BA 21) - Right auditory cortex (BA 41-42)             | 0.359  | 0.335 (0.242)  | 0.167 (0.319)  |
| Right middle temporal cortex (BA 21) - Right inferior frontal gyrus (BA 44-45-47)   | 0.636  | 0.321 (0.262)  | 0.058 (0.363)  |
| Right superior temporal cortex (BA 22) - Left angular gyrus (BA 39)                 | -1.153 | -0.122 (0.257) | 0.075 (0.239)  |
| Right superior temporal cortex (BA 22) - Left supramarginal gyrus (BA 40)           | -0.431 | -0.021 (0.263) | 0.137 (0.208)  |
| Right superior temporal cortex (BA 22) - Right premotor cortex (BA 6)               | -0.914 | -0.013 (0.330) | 0.205 (0.324)  |
| Left anterior temporal cortex (BA 38) - Right angular gyrus (BA 39)                 | 0.297  | 0.126 (0.248)  | -0.031 (0.266) |
| Left anterior temporal cortex (BA 38) - Right motor cortex (BA 4)                   | 0.507  | 0.145 (0.177)  | 0.028 (0.259)  |
| Left anterior temporal cortex (BA 38) - Left premotor cortex (BA 6)                 | 0.250  | 0.052 (0.245)  | 0.171 (0.224)  |
| Right anterior temporal cortex (BA 38) - Right supramarginal gyrus (BA 40)          | 0.041  | 0.240 (0.223)  | 0.110 (0.232)  |
| Right anterior temporal cortex (BA 38) - Left inferior frontal gyrus (BA 44-45-47)  | 0.663  | 0.294 (0.236)  | 0.173 (0.251)  |
| Right anterior temporal cortex (BA 38) - Right inferior frontal gyrus (BA 44-45-47) | -0.323 | -0.038 (0.250) | 0.112 (0.205)  |
| Right angular gyrus (BA 39) - Left motor cortex (BA 4)                              | 0.369  | 0.392 (0.270)  | 0.149 (0.379)  |
| Right angular gyrus (BA 39) - Left auditory cortex (BA 41-42)                       | 0.768  | 0.086 (0.214)  | -0.036 (0.182) |

|                                                                                   |        |                |                |
|-----------------------------------------------------------------------------------|--------|----------------|----------------|
| Left motor cortex (BA 4) - Left premotor cortex (BA 6)                            | 0.403  | 0.107 (0.263)  | -0.030 (0.222) |
| Right supramarginal gyrus (BA 40) - Right inferior frontal gyrus (BA 44-45-47)    | -0.181 | 0.318 (0.601)  | 0.566 (0.171)  |
| Left auditory cortex (BA 41-42) - Left premotor cortex (BA 6)                     | -0.581 | 0.162 (0.502)  | 0.374 (0.289)  |
| Left inferior frontal gyrus (BA 44-45-47) - Left premotor cortex (BA 6)           | -0.667 | -0.022 (0.214) | 0.098 (0.194)  |
| <b>Incorrect morphosyntactic forms</b>                                            |        |                |                |
| Left middle temporal cortex (BA 21) - Right middle temporal cortex (BA 21)        | -0.219 | 0.110 (0.223)  | 0.057 (0.254)  |
| Left middle temporal cortex (BA 21) - Left superior temporal cortex (BA 22)       | 1.023  | 0.369 (0.526)  | -0.094 (0.587) |
| Left middle temporal cortex (BA 21) - Left anterior temporal cortex (BA 38)       | -0.781 | 0.433 (0.515)  | 0.572 (0.418)  |
| Left middle temporal cortex (BA 21) - Left supramarginal gyrus (BA 40)            | 0.941  | 0.100 (0.238)  | 0.041 (0.212)  |
| Left middle temporal cortex (BA 21) - Right supramarginal gyrus (BA 40)           | 0.372  | 0.300 (0.354)  | 0.213 (0.345)  |
| Left middle temporal cortex (BA 21) - Left auditory cortex (BA 41-42)             | 0.115  | 0.083 (0.244)  | 0.047 (0.226)  |
| Left middle temporal cortex (BA 21) - Right inferior frontal gyrus (BA 44-45-47)  | 0.329  | 0.068 (0.263)  | 0.027 (0.228)  |
| Left middle temporal cortex (BA 21) - Right premotor cortex (BA 6)                | 0.665  | 0.089 (0.224)  | 0.047 (0.220)  |
| Right middle temporal cortex (BA 21) - Left superior temporal cortex (BA 22)      | -0.128 | 0.061 (0.257)  | -0.007 (0.262) |
| Right middle temporal cortex (BA 21) - Right superior temporal cortex (BA 22)     | -0.191 | 0.150 (0.533)  | 0.281 (0.472)  |
| Right middle temporal cortex (BA 21) - Left anterior temporal cortex (BA 38)      | 0.109  | 0.156 (0.180)  | 0.075 (0.240)  |
| Right middle temporal cortex (BA 21) - Right anterior temporal cortex (BA 38)     | 0.055  | 0.620 (0.234)  | 0.509 (0.441)  |
| Right middle temporal cortex (BA 21) - Left angular gyrus (BA 39)                 | -0.016 | 0.186 (0.205)  | 0.108 (0.240)  |
| Right middle temporal cortex (BA 21) - Right motor cortex (BA 4)                  | -0.295 | 0.122 (0.210)  | 0.091 (0.244)  |
| Right middle temporal cortex (BA 21) - Right auditory cortex (BA 41-42)           | 0.723  | 0.287 (0.217)  | 0.128 (0.336)  |
| Right middle temporal cortex (BA 21) - Left inferior frontal gyrus (BA 44-45-47)  | -0.209 | 0.040 (0.241)  | 0.090 (0.212)  |
| Right middle temporal cortex (BA 21) - Right inferior frontal gyrus (BA 44-45-47) | 0.906  | 0.330 (0.238)  | 0.058 (0.345)  |
| Right middle temporal cortex (BA 21) - Right premotor cortex (BA 6)               | 0.202  | 0.148 (0.241)  | 0.071 (0.254)  |
| Left superior temporal cortex (BA 22) - Left anterior temporal cortex (BA 38)     | 0.328  | 0.195 (0.453)  | -0.025 (0.487) |

|                                                                                   |        |                |                |
|-----------------------------------------------------------------------------------|--------|----------------|----------------|
| Left superior temporal cortex (BA 22) - Right anterior temporal cortex (BA 38)    | -0.087 | 0.037 (0.248)  | -0.042 (0.289) |
| Left superior temporal cortex (BA 22) - Left angular gyrus (BA 39)                | -1.017 | -0.028 (0.477) | 0.077 (0.415)  |
| Left superior temporal cortex (BA 22) - Right angular gyrus (BA 39)               | -0.521 | -0.040 (0.332) | 0.035 (0.221)  |
| Left superior temporal cortex (BA 22) - Left motor cortex (BA 4)                  | 0.049  | 0.163 (0.427)  | 0.044 (0.389)  |
| Left superior temporal cortex (BA 22) - Right motor cortex (BA 4)                 | 0.629  | 0.079 (0.278)  | -0.087 (0.261) |
| Left superior temporal cortex (BA 22) - Left supramarginal gyrus (BA 40)          | -0.136 | 0.117 (0.581)  | -0.013 (0.485) |
| Left superior temporal cortex (BA 22) - Right supramarginal gyrus (BA 40)         | 0.126  | 0.037 (0.263)  | -0.016 (0.213) |
| Left superior temporal cortex (BA 22) - Right auditory cortex (BA 41-42)          | -0.526 | 0.266 (0.693)  | 0.150 (0.708)  |
| Left superior temporal cortex (BA 22) - Left inferior frontal gyrus (BA 44-45-47) | -0.136 | 0.035 (0.264)  | -0.015 (0.258) |
| Left superior temporal cortex (BA 22) - Right premotor cortex (BA 6)              | 0.717  | 0.193 (0.448)  | -0.017 (0.390) |
| Right superior temporal cortex (BA 22) - Left anterior temporal cortex (BA 38)    | 0.173  | 0.036 (0.263)  | -0.038 (0.242) |
| Right superior temporal cortex (BA 22) - Right anterior temporal cortex (BA 38)   | -0.091 | -0.001 (0.258) | 0.088 (0.240)  |
| Right superior temporal cortex (BA 22) - Right angular gyrus (BA 39)              | -0.300 | 0.086 (0.435)  | 0.276 (0.334)  |
| Right superior temporal cortex (BA 22) - Left motor cortex (BA 4)                 | -0.249 | 0.063 (0.380)  | 0.201 (0.297)  |
| Right superior temporal cortex (BA 22) - Right motor cortex (BA 4)                | -0.613 | 0.150 (0.486)  | 0.248 (0.463)  |
| Right superior temporal cortex (BA 22) - Right supramarginal gyrus (BA 40)        | -0.197 | -0.001 (0.281) | 0.096 (0.260)  |
| Right superior temporal cortex (BA 22) - Left auditory cortex (BA 41-42)          | -0.106 | 0.190 (0.691)  | 0.444 (0.500)  |
| Right superior temporal cortex (BA 22) - Right auditory cortex (BA 41-42)         | 0.356  | 0.070 (0.397)  | 0.122 (0.328)  |
| Right superior temporal cortex (BA 22) - Left premotor cortex (BA 6)              | -0.638 | 0.022 (0.234)  | 0.078 (0.200)  |
| Right superior temporal cortex (BA 22) - Right premotor cortex (BA 6)             | -0.256 | 0.014 (0.367)  | 0.228 (0.274)  |
| Left anterior temporal cortex (BA 38) - Right angular gyrus (BA 39)               | -0.216 | 0.092 (0.238)  | 0.052 (0.218)  |
| Left anterior temporal cortex (BA 38) - Left motor cortex (BA 4)                  | 0.265  | 0.208 (0.209)  | 0.167 (0.237)  |
| Left anterior temporal cortex (BA 38) - Right motor cortex (BA 4)                 | 0.255  | 0.361 (0.217)  | 0.261 (0.300)  |
| Left anterior temporal cortex (BA 38) - Left auditory cortex (BA 41-42)           | -0.144 | 0.130 (0.224)  | 0.094 (0.241)  |
| Left anterior temporal cortex (BA 38) - Right auditory cortex (BA 41-42)          | -0.116 | 0.133 (0.211)  | 0.091 (0.250)  |

|                                                                                     |        |               |                |
|-------------------------------------------------------------------------------------|--------|---------------|----------------|
| Left anterior temporal cortex (BA 38) - Right inferior frontal gyrus (BA 44-45-47)  | -0.212 | 0.097 (0.258) | 0.157 (0.246)  |
| Left anterior temporal cortex (BA 38) - Left premotor cortex (BA 6)                 | 0.217  | 0.122 (0.200) | 0.076 (0.216)  |
| Left anterior temporal cortex (BA 38) - Right premotor cortex (BA 6)                | -0.145 | 0.090 (0.253) | 0.034 (0.281)  |
| Right anterior temporal cortex (BA 38) - Right angular gyrus (BA 39)                | -0.057 | 0.063 (0.207) | 0.124 (0.235)  |
| Right anterior temporal cortex (BA 38) - Left supramarginal gyrus (BA 40)           | -0.014 | 0.179 (0.207) | 0.119 (0.280)  |
| Right anterior temporal cortex (BA 38) - Right supramarginal gyrus (BA 40)          | -0.585 | 0.042 (0.246) | 0.104 (0.219)  |
| Right anterior temporal cortex (BA 38) - Right auditory cortex (BA 41-42)           | 0.276  | 0.363 (0.243) | 0.221 (0.337)  |
| Right anterior temporal cortex (BA 38) - Left inferior frontal gyrus (BA 44-45-47)  | 0.138  | 0.052 (0.351) | 0.093 (0.231)  |
| Right anterior temporal cortex (BA 38) - Right inferior frontal gyrus (BA 44-45-47) | -0.664 | 0.093 (0.583) | 0.359 (0.455)  |
| Left angular gyrus (BA 39) - Left supramarginal gyrus (BA 40)                       | -0.018 | 0.050 (0.213) | 0.095 (0.227)  |
| Left angular gyrus (BA 39) - Right supramarginal gyrus (BA 40)                      | -0.559 | 0.144 (0.435) | 0.210 (0.425)  |
| Left angular gyrus (BA 39) - Right inferior frontal gyrus (BA 44-45-47)             | -0.114 | 0.079 (0.232) | 0.115 (0.224)  |
| Left angular gyrus (BA 39) - Right premotor cortex (BA 6)                           | 0.129  | 0.039 (0.318) | 0.087 (0.228)  |
| Right angular gyrus (BA 39) - Left motor cortex (BA 4)                              | 0.614  | 0.144 (0.217) | 0.066 (0.207)  |
| Right angular gyrus (BA 39) - Left auditory cortex (BA 41-42)                       | 0.109  | 0.140 (0.191) | 0.050 (0.211)  |
| Right angular gyrus (BA 39) - Left inferior frontal gyrus (BA 44-45-47)             | -0.324 | 0.182 (0.276) | 0.140 (0.284)  |
| Right angular gyrus (BA 39) - Right inferior frontal gyrus (BA 44-45-47)            | 0.798  | 0.152 (0.263) | -0.002 (0.243) |
| Right angular gyrus (BA 39) - Left premotor cortex (BA 6)                           | 0.297  | 0.053 (0.238) | 0.012 (0.183)  |
| Right angular gyrus (BA 39) - Right premotor cortex (BA 6)                          | 0.222  | 0.085 (0.185) | 0.016 (0.192)  |
| Left motor cortex (BA 4) - Right motor cortex (BA 4)                                | 0.260  | 0.114 (0.288) | 0.058 (0.262)  |
| Left motor cortex (BA 4) - Right supramarginal gyrus (BA 40)                        | 0.230  | 0.181 (0.176) | 0.127 (0.217)  |
| Left motor cortex (BA 4) - Left auditory cortex (BA 41-42)                          | 0.259  | 0.287 (0.362) | 0.233 (0.218)  |
| Left motor cortex (BA 4) - Left inferior frontal gyrus (BA 44-45-47)                | 0.246  | 0.091 (0.193) | 0.065 (0.194)  |
| Left motor cortex (BA 4) - Left premotor cortex (BA 6)                              | -0.323 | 0.416 (0.277) | 0.331 (0.274)  |
| Right motor cortex (BA 4) - Right supramarginal gyrus (BA 40)                       | 0.807  | 0.324 (0.317) | 0.165 (0.223)  |

|                                                                                |        |               |               |
|--------------------------------------------------------------------------------|--------|---------------|---------------|
| Right motor cortex (BA 4) - Left auditory cortex (BA 41-42)                    | 0.087  | 0.376 (0.570) | 0.512 (0.329) |
| Right motor cortex (BA 4) - Right inferior frontal gyrus (BA 44-45-47)         | -0.135 | 0.255 (0.222) | 0.165 (0.302) |
| Right motor cortex (BA 4) - Right premotor cortex (BA 6)                       | -0.048 | 0.156 (0.241) | 0.102 (0.232) |
| Left supramarginal gyrus (BA 40) - Left inferior frontal gyrus (BA 44-45-47)   | 0.170  | 0.198 (0.263) | 0.132 (0.299) |
| Left supramarginal gyrus (BA 40) - Left premotor cortex (BA 6)                 | 0.082  | 0.296 (0.266) | 0.172 (0.228) |
| Left supramarginal gyrus (BA 40) - Right premotor cortex (BA 6)                | 0.033  | 0.011 (0.270) | 0.061 (0.237) |
| Right supramarginal gyrus (BA 40) - Left auditory cortex (BA 41-42)            | 0.488  | 0.057 (0.253) | 0.098 (0.209) |
| Right supramarginal gyrus (BA 40) - Right auditory cortex (BA 41-42)           | 0.132  | 0.116 (0.223) | 0.023 (0.234) |
| Right supramarginal gyrus (BA 40) - Left inferior frontal gyrus (BA 44-45-47)  | 0.593  | 0.562 (0.207) | 0.371 (0.444) |
| Right supramarginal gyrus (BA 40) - Right inferior frontal gyrus (BA 44-45-47) | 0.266  | 0.151 (0.251) | 0.025 (0.258) |
| Right supramarginal gyrus (BA 40) - Right premotor cortex (BA 6)               | 0.214  | 0.150 (0.256) | 0.073 (0.299) |
| Left auditory cortex (BA 41-42) - Right auditory cortex (BA 41-42)             | -0.596 | 0.123 (0.228) | 0.071 (0.247) |
| Left auditory cortex (BA 41-42) - Left inferior frontal gyrus (BA 44-45-47)    | -0.088 | 0.331 (0.328) | 0.209 (0.267) |
| Left auditory cortex (BA 41-42) - Left premotor cortex (BA 6)                  | -0.861 | 0.206 (0.406) | 0.291 (0.236) |
| Right auditory cortex (BA 41-42) - Left inferior frontal gyrus (BA 44-45-47)   | 0.401  | 0.088 (0.226) | 0.010 (0.215) |
| Right auditory cortex (BA 41-42) - Right inferior frontal gyrus (BA 44-45-47)  | -0.368 | 0.209 (0.274) | 0.172 (0.271) |
| Right auditory cortex (BA 41-42) - Left premotor cortex (BA 6)                 | -0.754 | 0.004 (0.270) | 0.061 (0.246) |
| Left inferior frontal gyrus (BA 44-45-47) - Left premotor cortex (BA 6)        | 0.046  | 0.005 (0.259) | 0.048 (0.229) |
| Right inferior frontal gyrus (BA 44-45-47) - Right premotor cortex (BA 6)      | 0.415  | 0.256 (0.393) | 0.180 (0.410) |
| Left premotor cortex (BA 6) - Right premotor cortex (BA 6)                     | -0.562 | 0.044 (0.226) | 0.122 (0.205) |
